# Supplementary material for: Head movements and the optic flow generated during the learning flights of bumblebees
Source: Oxford University Press journal article supplement (doi:10.1242/jeb.102897), 2014-07-30
Supplement: jeb102897_video_abstract.pdf [file jeb102897_video_abstract.pdf]

**Head movements and the optic flow  
generated during the learning flights of  
bumblebees**

Olena Riabinina, Natalie Heisenberg, Barbara, Andrew Philippides  
and Thomas S. Collett

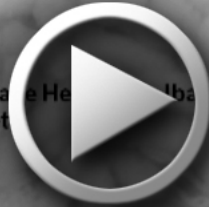

**PLAY VIDEO**

The Journal of Experimental Biology (2014) 217, 2633-2642

doi:10.1242/jeb.102897

**Riabinina Video Abstract**
